# Supplementary material
Source: HighWire-hosted journal article supplement (https://heart.bmj.com/content/107/10/836)
Supplement: inline-supplementary-material-4 [file inline-supplementary-material-4.pdf]

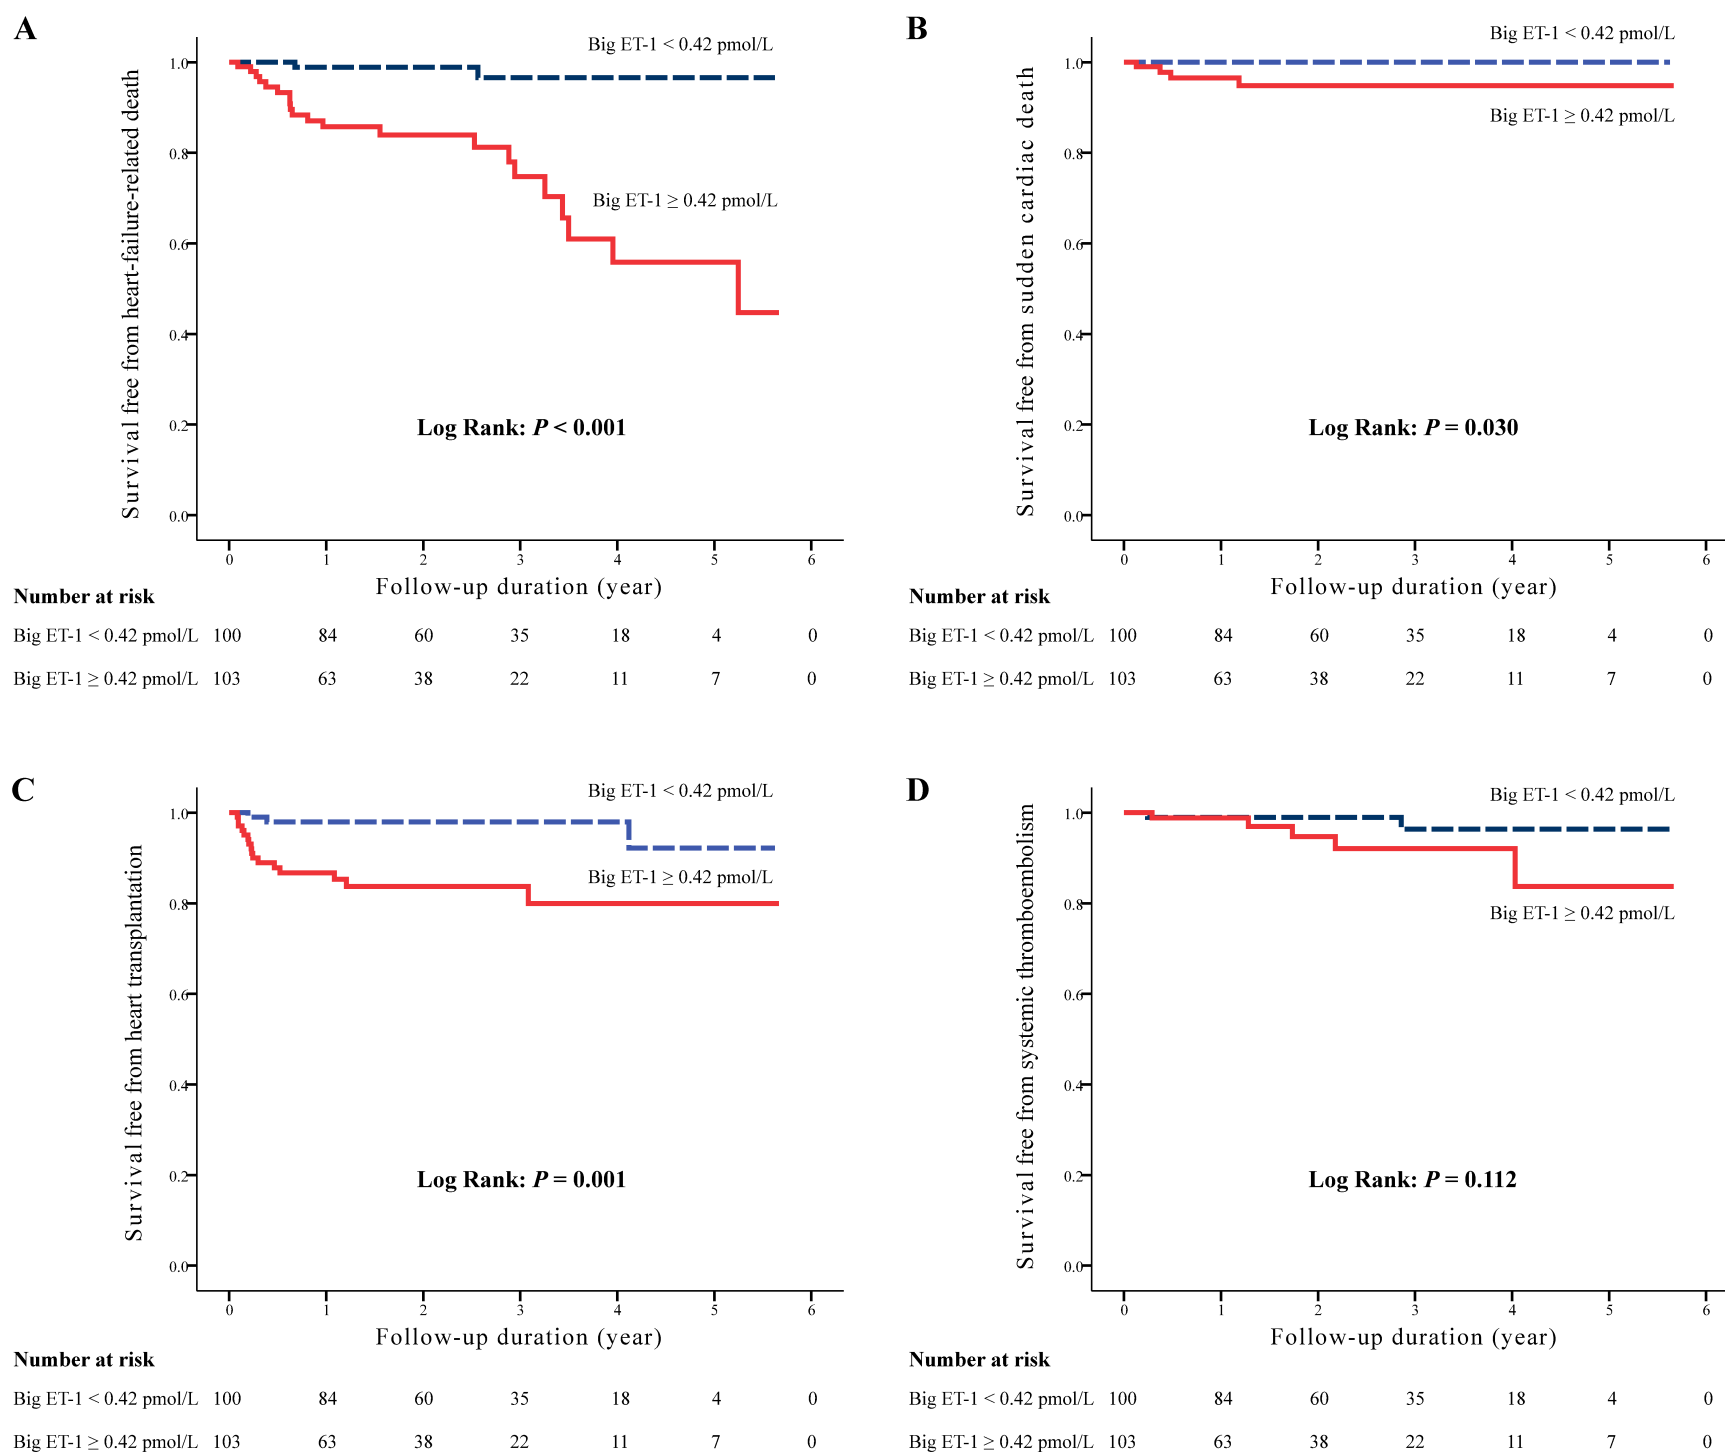

**Supplemental Figure 3.** Kaplan-Meier curves of survival free from heart failure-related death (A), sudden cardiac death (B), heart transplantation (C), and systemic embolism (D). The  $P$ -values were calculated by the Log-rank test.
